# Supplementary material for: Pure inorganic D–A type polyoxometalate/reduced graphene oxide nanocomposite for the photoanode of dye-sensitized solar cells
Source: Royal Society of Chemistry journal article supplement (doi:10.1039/c5ta10601j), 2016-01-01
Supplement: c5ta10601j1.pdf [file c5ta10601j1.pdf]

## Supporting informations

Pure inorganic D-A type polyoxometalate/reduced graphene oxide nanocomposite for the photoanode of Dye-sensitized Solar Cells†

Chun-Hui Shan, Hong Zhang\*, Wei-Lin Chen\*, Zhong-Min Su, and En-Bo Wang\*

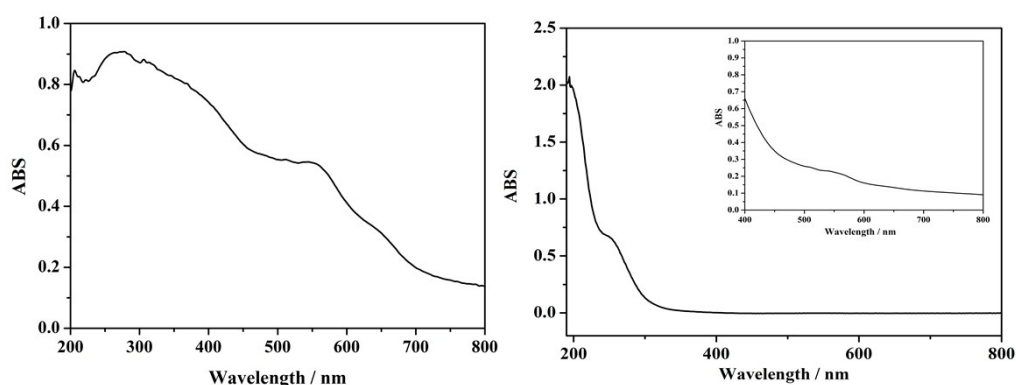

Fig.S1 UV/Vis reflection spectra of  $\text{SiW}_9\text{Co}_3$ : (a) in the solid state and (b) in the solution

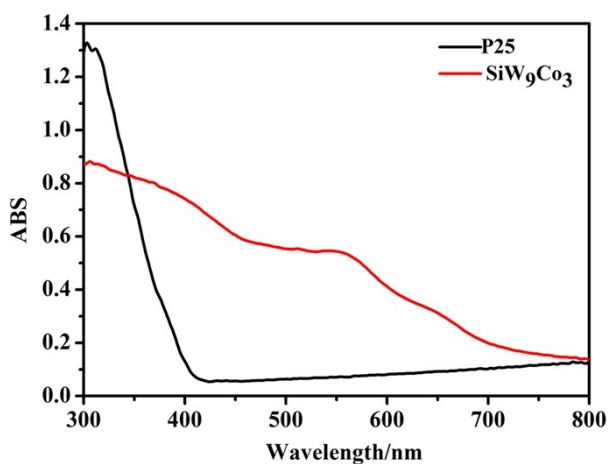

Fig.S2 UV/Vis reflection spectra of P25 and  $\text{SiW}_9\text{Co}_3$  in the solid state

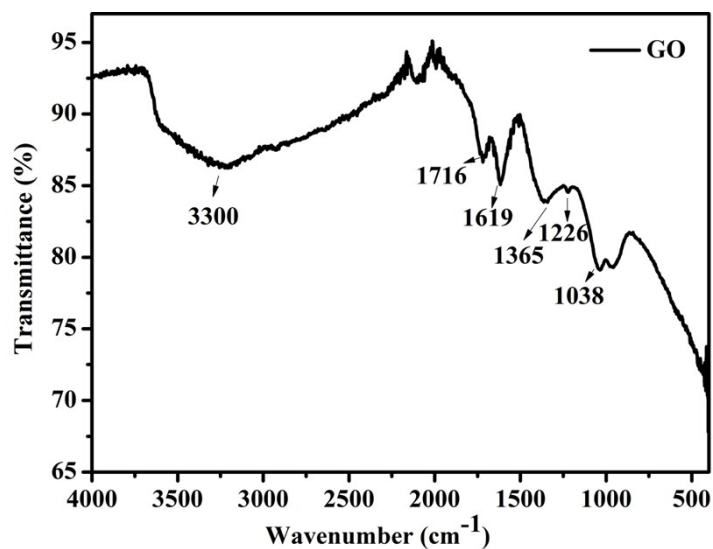

**Fig. S3** FTIR spectrum of GO. The O-H stretching at 3300 cm<sup>-1</sup>, the C=O stretching at 1716 cm<sup>-1</sup>, the peak at 1619 cm<sup>-1</sup> is the skeletal vibrations of remnant sp<sup>2</sup> species, the O-H deformation at 1365 cm<sup>-1</sup>, the C-OH stretching at 1226 cm<sup>-1</sup> and the C-O-C stretching at 1038 cm<sup>-1</sup>.

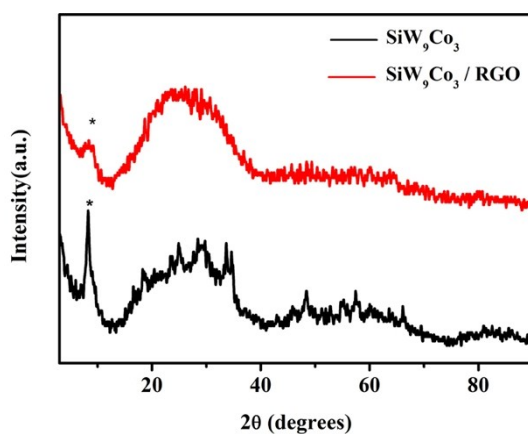

**Fig.S4** XRD patterns of SiW<sub>9</sub>Co<sub>3</sub> and SiW<sub>9</sub>Co<sub>3</sub>/RGO

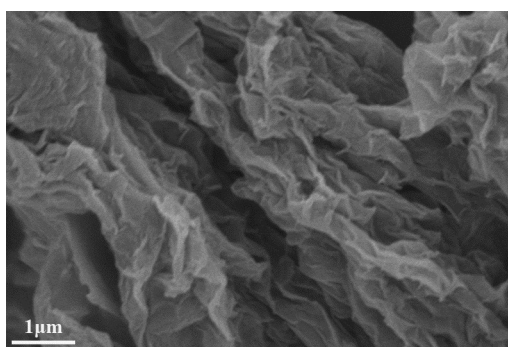

**Fig.S5** The SEM image of RGO

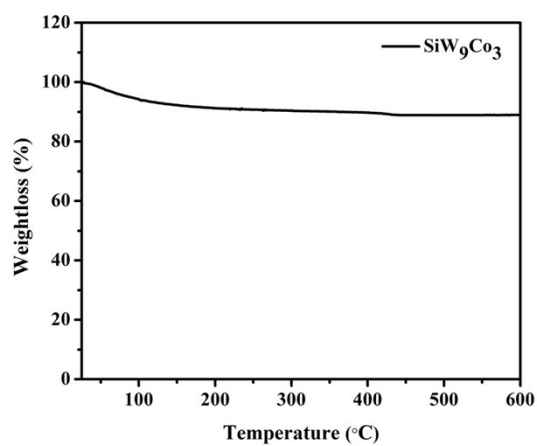

**Fig. S6** TG curve of  $\text{SiW}_9\text{Co}_3$

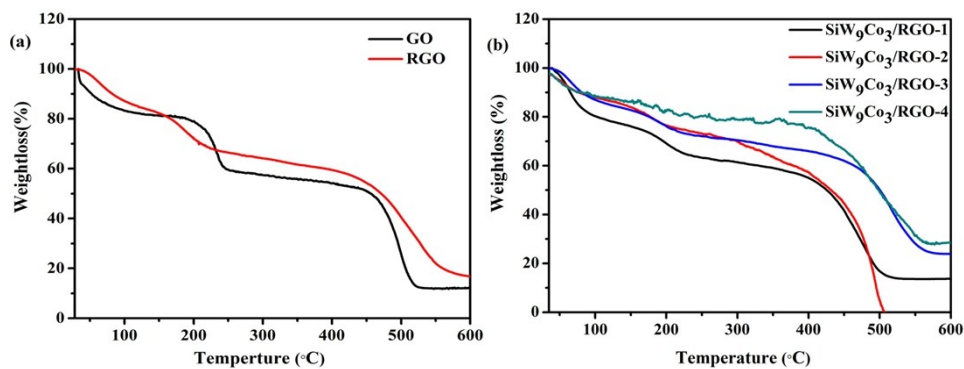

**Fig.S7** (a) TG curves of GO and RGO, (b)  $\text{SiW}_9\text{Co}_3/\text{RGO}$ -1,  $\text{SiW}_9\text{Co}_3/\text{RGO}$ -2,  $\text{SiW}_9\text{Co}_3/\text{RGO}$ -3 and  $\text{SiW}_9\text{Co}_3/\text{RGO}$ -4
